# Supplementary material for: Sclerostin as Regulatory Molecule in Vascular Media Calcification and the Bone–Vascular Axis
Source: MDPI journal article supplement (doi:10.3390/toxins11070428), 2019-07-21
Supplement: s1 [file s1]

## Supplementary Materials: Sclerostin as Regulatory Molecule in Vascular Media Calcification and the Bone–Vascular Axis

Annelies De Maré, Stuart Maudsley, Abdelkrim Azmi, Jhana O. Hendrickx, Britt Opdebeeck, Ellen Neven, Patrick C D’Haese and Anja Verhulst

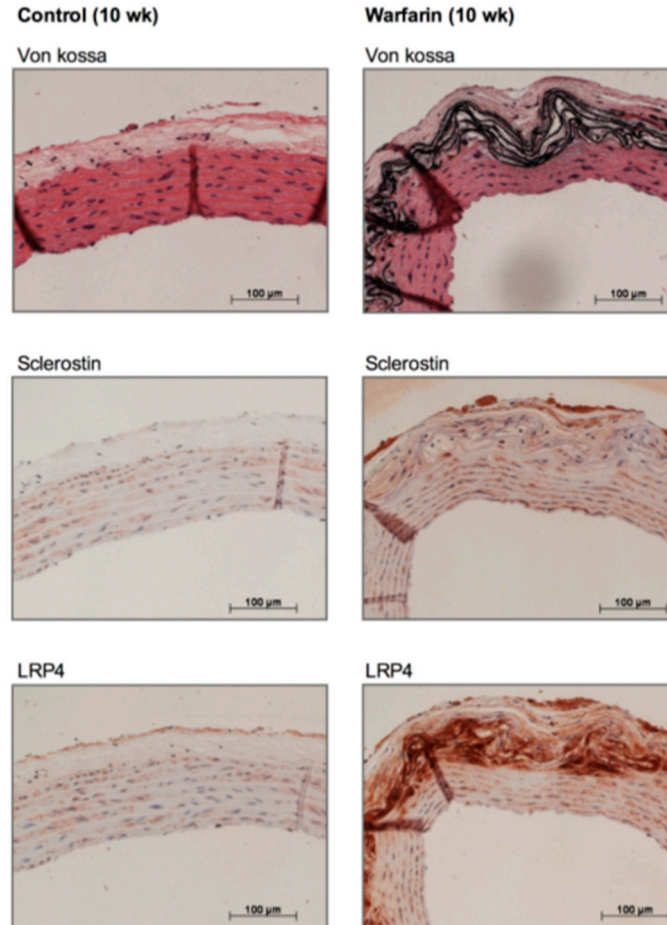

**Figure S1:** Consecutive tissue sections, stained with von Kossa and immunostained for sclerostin and LRP4. Tissue sections of a control rat (left) and a 10-week warfarin-treated rat (right).
